# Supplementary material
Source: PubMed Central journal article supplement (PMC6343597)
Supplement: BLT-17-004_Supplementary_content.pdf [file BLT-17-004_Supplementary_content.pdf]

## Online Supplementary Content

**Table SI** - Newcastle Ottawa Quality Assessment Scale for the 41 cohort studies included in the systematic review.

| First author, year publication <sup>reference</sup> | Selection | Comparability | Outcome |
|-----------------------------------------------------|-----------|---------------|---------|
| Abdelrazik, 2016 <sup>48</sup>                      | ****      | **            | ***     |
| Ahmed, 2010 <sup>20</sup>                           | ****      | **            | ***     |
| Alkindi, 2017 <sup>51</sup>                         | ****      | **            | ***     |
| Al-Rijami, 2014 <sup>32</sup>                       | ****      | **            | ***     |
| Al-Rijami, 2018 <sup>52</sup>                       | ****      | **            | ***     |
| Ameen, 2003 <sup>14</sup>                           | ****      | **            | ***     |
| Azarkeivan, 2011 <sup>25</sup>                      | ****      | **            | ***     |
| Bhuva, 2017 <sup>49</sup>                           | ****      | **            | ***     |
| Bilwani, 2005 <sup>15</sup>                         | ****      | **            | ***     |
| Chao, 2013 <sup>30</sup>                            | ****      | **            | ***     |
| Chaudhari, 2013 <sup>23</sup>                       | ****      | *             | ***     |
| Cheng, 2012 <sup>28</sup>                           | ****      | **            | ***     |
| Danasoury, 2012 <sup>29</sup>                       | ****      | **            | ***     |
| Datta, 2015 <sup>41</sup>                           | ****      | **            | ***     |
| Davari, 2016 <sup>47</sup>                          | ****      | **            | ***     |
| Davoudi-Kiakalayeh, 2017 <sup>50</sup>              | ****      | **            | ***     |
| Dhawan, 2014 <sup>33</sup>                          | ****      | **            | ***     |
| Dogra, 2015 <sup>40</sup>                           | ****      | **            | ***     |
| Elhence, 2014 <sup>38</sup>                         | ****      | **            | ***     |
| Guirat-Dhouib, 2011 <sup>24</sup>                   | ****      | **            | ***     |
| Gupta, 2011 <sup>22</sup>                           | ****      | **            | ***     |
| Hussein, 2014 <sup>35</sup>                         | ****      | **            | ***     |
| Jain, 2014 <sup>34</sup>                            | ****      | **            | ***     |
| Jansuwan, 2015 <sup>42</sup>                        | ****      | **            | ***     |
| Karimi, 2007 <sup>18</sup>                          | ****      | **            | ***     |
| Kocigit, 2014 <sup>37</sup>                         | ****      | **            | ***     |
| Makroo, 2013 <sup>31</sup>                          | ****      | **            | ***     |
| Moeen, 2018 <sup>53</sup>                           | ****      | **            | ***     |
| Noor Haslina, 2006 <sup>17</sup>                    | ****      | **            | ***     |
| Obaid, 2015 <sup>46</sup>                           | ****      | **            | ***     |
| Pahuja, 2010 <sup>21</sup>                          | ****      | **            | ***     |
| Philip, 2014 <sup>36</sup>                          | ****      | **            | ***     |
| Sadeghian, 2009 <sup>19</sup>                       | ****      | **            | ***     |
| Saied, 2011 <sup>27</sup>                           | ****      | **            | ***     |
| Seferi, 2015 <sup>43</sup>                          | ****      | **            | ***     |
| Singer, 2001 <sup>13</sup>                          | ****      | **            | ***     |
| Thompson, 2001 <sup>26</sup>                        | ****      | **            | ***     |
| Vaziri, 2015 <sup>44</sup>                          | ****      | **            | ***     |
| Vichinsky, 2014 <sup>39</sup>                       | ****      | **            | ***     |
| Wang, 2006 <sup>16</sup>                            | ****      | *             | ***     |
| Zaidi, 2015 <sup>45</sup>                           | ****      | **            | ***     |

Footnote. A study can be awarded a maximum of four stars for selection, a maximum of two stars for comparability and a maximum of three stars for outcome.

**Table SII** - Detailed analysis of red blood cell alloantibodies in each study included in the systematic review (all patients with thalassaemia).

| Study (year) <sup>ref</sup>            | Frequency of specific alloantibodies |            |           |           |           |           |          |          |          |          |           |          |            |           |          |          |           |          |          |          |           |          |           |           |          |
|----------------------------------------|--------------------------------------|------------|-----------|-----------|-----------|-----------|----------|----------|----------|----------|-----------|----------|------------|-----------|----------|----------|-----------|----------|----------|----------|-----------|----------|-----------|-----------|----------|
|                                        | anti-D                               | anti-E     | anti-C    | anti-c    | anti-e    | anti-Cw   | anti-cw  | anti-f   | anti-G   | anti-WA1 | anti-v    | anti-V   | anti-Kpa   | anti-Kpb  | anti-Jsa | anti-Fya | anti-Fyb  | anti-M   | anti-N   | anti-S   | anti-s    | anti-I   | anti-i    | anti-Jka  | anti-Jkb |
| Singer (2000) <sup>13</sup>            | 0                                    | 4          | 0         | 2         | 0         | 0         | 0        | 0        | 0        | 0        | 0         | 0        | 6          | 1         | 0        | 0        | 0         | 1        | 0        | 0        | 0         | 2        | 0         | 0         | 1        |
| Ameer (2003) <sup>14</sup>             | 12                                   | 26         | 9         | 5         | 0         | 5         | 0        | 0        | 0        | 12       | 0         | 41       | 3          | 0         | 2        | 2        | 2         | 0        | 0        | 3        | 0         | 0        | 6         | 1         |          |
| Biwani (2005) <sup>15</sup>            | 1                                    | 1          | 0         | 0         | 0         | 0         | 0        | 0        | 0        | 0        | 0         | 3        | 0          | 0         | 0        | 0        | 0         | 0        | 0        | 0        | 0         | 0        | 0         | 0         |          |
| Wang (2006) <sup>16</sup>              | 1                                    | 4          | 0         | 0         | 0         | 0         | 0        | 0        | 0        | 0        | 0         | 0        | 0          | 0         | 0        | 0        | 0         | 0        | 0        | 1        | 0         | 0        | 0         | 0         |          |
| Noor Haslina (2006) <sup>17</sup>      | 0                                    | 2          | 0         | 0         | 0         | 0         | 0        | 0        | 0        | 0        | 0         | 1        | 0          | 0         | 0        | 0        | 0         | 0        | 0        | 0        | 0         | 0        | 0         | 0         |          |
| Karimi (2007) <sup>18</sup>            | 6                                    | 4          | 2         | 2         | 1         | 0         | 0        | 0        | 0        | 0        | 0         | 19       | 0          | 0         | 0        | 0        | 0         | 0        | 0        | 0        | 0         | 0        | 0         | 0         |          |
| Sadeghian (2009) <sup>19</sup>         | 5                                    | 1          | 0         | 0         | 0         | 0         | 0        | 0        | 0        | 0        | 0         | 0        | 0          | 0         | 0        | 0        | 0         | 0        | 0        | 0        | 0         | 0        | 0         | 0         |          |
| Ahmed (2010) <sup>20</sup>             | 0                                    | 10         | 6         | 0         | 0         | 0         | 0        | 0        | 0        | 0        | 0         | 16       | 2          | 0         | 2        | 0        | 2         | 1        | 0        | 0        | 0         | 0        | 0         | 0         |          |
| Pahaja (2010) <sup>21</sup>            | 1                                    | 1          | 0         | 1         | 0         | 0         | 0        | 0        | 0        | 0        | 0         | 2        | 1          | 0         | 0        | 0        | 0         | 0        | 0        | 0        | 0         | 0        | 0         | 0         |          |
| Gupta (2011) <sup>22</sup>             | 1                                    | 3          | 0         | 0         | 0         | 2         | 0        | 0        | 0        | 0        | 0         | 3        | 1          | 0         | 0        | 0        | 0         | 0        | 0        | 0        | 0         | 0        | 0         | 0         |          |
| Chaudhari (2011) <sup>23</sup>         | 0                                    | 2          | 0         | 1         | 0         | 0         | 0        | 0        | 0        | 0        | 0         | 0        | 0          | 0         | 0        | 0        | 0         | 0        | 0        | 0        | 0         | 0        | 0         | 1         |          |
| Guirat-Dhoutib (2011) <sup>24</sup>    | 1                                    | 3          | 3         | 0         | 0         | 0         | 0        | 0        | 0        | 0        | 0         | 1        | 0          | 0         | 0        | 0        | 0         | 0        | 0        | 0        | 0         | 0        | 0         | 0         |          |
| Azarkévan (2011) <sup>25</sup>         | 11                                   | 10         | 2         | 8         | 1         | 0         | 4        | 0        | 0        | 0        | 0         | 34       | 0          | 0         | 0        | 0        | 0         | 0        | 0        | 0        | 0         | 0        | 0         | 0         |          |
| Thompson (2011) <sup>26</sup>          | 4                                    | 22         | 11        | 7         | 6         | 1         | 0        | 1        | 1        | 0        | 2         | 21       | 6          | 0         | 0        | 1        | 1         | 2        | 0        | 3        | 0         | 0        | 5         | 4         |          |
| Sated (2011) <sup>27</sup>             | 3                                    | 13         | 4         | 3         | 0         | 0         | 0        | 0        | 0        | 0        | 0         | 13       | 0          | 0         | 0        | 3        | 1         | 2        | 0        | 3        | 1         | 1        | 2         | 2         |          |
| Cheng (2012) <sup>28</sup>             | 0                                    | 42         | 1         | 14        | 1         | 0         | 0        | 1        | 0        | 0        | 0         | 1        | 0          | 0         | 0        | 0        | 2         | 0        | 0        | 2        | 0         | 0        | 7         | 1         |          |
| El-Damasoury (2012) <sup>29</sup>      | 6                                    | 11         | 7         | 0         | 0         | 5         | 0        | 0        | 0        | 0        | 0         | 11       | 0          | 0         | 0        | 0        | 0         | 0        | 2        | 0        | 0         | 0        | 2         | 1         |          |
| Chao (2013) <sup>30</sup>              | 0                                    | 4          | 1         | 0         | 0         | 0         | 0        | 0        | 0        | 0        | 0         | 0        | 0          | 0         | 0        | 0        | 0         | 0        | 0        | 0        | 0         | 0        | 0         | 0         |          |
| Makroo (2013) <sup>31</sup>            | 1                                    | 7          | 0         | 0         | 0         | 1         | 0        | 0        | 0        | 0        | 0         | 8        | 0          | 0         | 0        | 0        | 0         | 0        | 0        | 0        | 0         | 0        | 0         | 0         |          |
| Al-Riyami (2014) <sup>32</sup>         | 0                                    | 2          | 0         | 0         | 0         | 0         | 0        | 0        | 0        | 0        | 0         | 1        | 0          | 0         | 0        | 0        | 0         | 0        | 0        | 0        | 0         | 0        | 0         | 0         |          |
| Dhawan (2014) <sup>33</sup>            | 2                                    | 2          | 1         | 0         | 0         | 1         | 0        | 0        | 0        | 0        | 0         | 6        | 0          | 0         | 0        | 0        | 0         | 0        | 0        | 0        | 0         | 0        | 0         | 1         |          |
| Jain (2014) <sup>34</sup>              | 0                                    | 1          | 0         | 0         | 0         | 0         | 0        | 0        | 0        | 0        | 0         | 3        | 1          | 0         | 0        | 0        | 0         | 0        | 0        | 0        | 0         | 0        | 0         | 0         |          |
| Hussein (2014) <sup>35</sup>           | 3                                    | 8          | 0         | 1         | 0         | 0         | 0        | 0        | 0        | 0        | 0         | 16       | 0          | 0         | 0        | 2        | 0         | 0        | 0        | 0        | 0         | 0        | 1         | 0         |          |
| Philip (2014) <sup>36</sup>            | 1                                    | 3          | 0         | 1         | 0         | 0         | 0        | 0        | 0        | 0        | 0         | 0        | 0          | 0         | 0        | 0        | 0         | 0        | 0        | 0        | 0         | 0        | 0         | 0         |          |
| Kocigit (2014) <sup>37</sup>           | 0                                    | 1          | 1         | 0         | 0         | 0         | 0        | 0        | 0        | 0        | 0         | 3        | 0          | 0         | 0        | 0        | 0         | 0        | 0        | 0        | 0         | 0        | 0         | 0         |          |
| Elheuce (2014) <sup>38</sup>           | 0                                    | 8          | 1         | 2         | 0         | 0         | 0        | 0        | 0        | 0        | 0         | 6        | 0          | 0         | 0        | 0        | 0         | 0        | 1        | 1        | 0         | 0        | 1         | 0         |          |
| Vichinsky (2014) <sup>39</sup>         | 3                                    | 29         | 12        | 5         | 2         | 2         | 0        | 1        | 1        | 2        | 0         | 4        | 17         | 4         | 0        | 1        | 1         | 1        | 0        | 3        | 0         | 3        | 6         | 2         |          |
| Dogra (2015) <sup>40</sup>             | 1                                    | 3          | 0         | 0         | 0         | 0         | 0        | 0        | 0        | 0        | 0         | 2        | 0          | 0         | 0        | 0        | 0         | 0        | 0        | 0        | 0         | 0        | 0         | 0         |          |
| Datta (2015) <sup>41</sup>             | 1                                    | 6          | 1         | 8         | 0         | 0         | 0        | 0        | 0        | 0        | 0         | 0        | 0          | 0         | 0        | 0        | 0         | 0        | 0        | 0        | 1         | 0        | 1         | 2         |          |
| Janswan (2015) <sup>42</sup>           | 0                                    | 13         | 0         | 1         | 0         | 0         | 0        | 0        | 0        | 0        | 0         | 0        | 0          | 0         | 0        | 0        | 0         | 1        | 0        | 0        | 0         | 0        | 0         | 0         |          |
| Seferi (2015) <sup>43</sup>            | 0                                    | 1          | 0         | 0         | 1         | 1         | 0        | 0        | 0        | 0        | 0         | 3        | 0          | 0         | 0        | 0        | 0         | 0        | 0        | 0        | 0         | 0        | 0         | 1         |          |
| Vaziri (2015) <sup>44</sup>            | 0                                    | 0          | 0         | 0         | 0         | 0         | 0        | 0        | 0        | 0        | 0         | 3        | 0          | 0         | 0        | 0        | 0         | 0        | 0        | 0        | 0         | 0        | 0         | 0         |          |
| Zaidi (2015) <sup>45</sup>             | 1                                    | 4          | 0         | 0         | 2         | 0         | 0        | 0        | 0        | 0        | 0         | 0        | 0          | 0         | 0        | 0        | 0         | 0        | 0        | 0        | 0         | 0        | 0         | 0         |          |
| Obaid (2015) <sup>46</sup>             | 1                                    | 0          | 0         | 1         | 0         | 0         | 0        | 0        | 0        | 0        | 0         | 1        | 2          | 4         | 0        | 0        | 0         | 0        | 0        | 0        | 0         | 0        | 0         | 0         |          |
| Davari (2016) <sup>47</sup>            | 0                                    | 1          | 0         | 1         | 0         | 0         | 0        | 0        | 0        | 0        | 0         | 6        | 0          | 0         | 0        | 0        | 0         | 0        | 0        | 0        | 0         | 0        | 0         | 0         |          |
| Abtelrazik (2016) <sup>48</sup>        | 8                                    | 2          | 2         | 2         | 0         | 0         | 0        | 0        | 0        | 0        | 0         | 1        | 0          | 0         | 2        | 0        | 0         | 0        | 0        | 0        | 0         | 0        | 0         | 0         |          |
| Bhava (2017) <sup>49</sup>             | 3                                    | 1          | 0         | 0         | 0         | 0         | 0        | 0        | 0        | 0        | 0         | 4        | 1          | 0         | 0        | 0        | 0         | 0        | 0        | 0        | 0         | 0        | 0         | 0         |          |
| Davoudi-Kakalayeh (2017) <sup>50</sup> | 6                                    | 11         | 2         | 0         | 0         | 0         | 0        | 0        | 0        | 0        | 0         | 15       | 2          | 0         | 0        | 0        | 0         | 0        | 0        | 0        | 0         | 0        | 0         | 0         |          |
| Alkindi (2017) <sup>51</sup>           | 1                                    | 6          | 0         | 2         | 1         | 0         | 0        | 0        | 0        | 0        | 0         | 7        | 1          | 0         | 0        | 0        | 0         | 0        | 0        | 0        | 0         | 0        | 0         | 0         |          |
| Al-Riyami (2018) <sup>52</sup>         | 3                                    | 6          | 3         | 3         | 2         | 0         | 0        | 0        | 0        | 0        | 0         | 6        | 2          | 0         | 0        | 0        | 0         | 0        | 0        | 0        | 0         | 0        | 0         | 0         |          |
| Mosen (2018) <sup>53</sup>             | 0                                    | 0          | 0         | 0         | 0         | 4         | 0        | 0        | 0        | 0        | 0         | 2        | 0          | 0         | 0        | 0        | 0         | 0        | 0        | 2        | 0         | 0        | 0         | 0         |          |
| <b>IQTAL</b>                           | <b>87</b>                            | <b>278</b> | <b>69</b> | <b>70</b> | <b>17</b> | <b>22</b> | <b>4</b> | <b>3</b> | <b>2</b> | <b>2</b> | <b>12</b> | <b>6</b> | <b>285</b> | <b>27</b> | <b>4</b> | <b>2</b> | <b>13</b> | <b>7</b> | <b>8</b> | <b>3</b> | <b>18</b> | <b>2</b> | <b>33</b> | <b>17</b> |          |
| %                                      | 6,70                                 | 21,40      | 5,31      | 5,39      | 1,31      | 1,69      | 0,31     | 0,23     | 0,15     | 0,15     | 0,82      | 0,46     | 21,94      | 2,08      | 0,31     | 0,15     | 1,00      | 0,54     | 0,62     | 0,23     | 1,39      | 0,15     | 0,31      | 0,15      | 1,31     |

**Table SIII** - Tests used for alloantibody screening.

| Study (year) <sup>ref</sup>             | Type of alloantibody testing                                 |
|-----------------------------------------|--------------------------------------------------------------|
| Singer (2000) <sup>13</sup>             | Not specified                                                |
| Ameen (2003) <sup>14</sup>              | Gel microplate assay (GMpA) and Gel microcolumn assay (GMcA) |
| Bilwani (2005) <sup>15</sup>            | Gel microplate assay (GMpA)                                  |
| Wang (2006) <sup>16</sup>               | More than one method used                                    |
| Noor Haslina (2006) <sup>17</sup>       | Gel microcolumn assay (GMcA)                                 |
| Karimi (2007) <sup>18</sup>             | Not specified                                                |
| Sadeghian (2009) <sup>19</sup>          | Conventional tube test (CTT)                                 |
| Ahmed (2010) <sup>20</sup>              | Gel microcolumn assay (GMcA)                                 |
| Pahuja (2010) <sup>21</sup>             | Gel microcolumn assay (GMcA)                                 |
| Gupta (2011) <sup>22</sup>              | Gel microcolumn assay (GMcA)                                 |
| Chaudhari (2011) <sup>23</sup>          | Gel microcolumn assay (GMcA)                                 |
| Guirat-Dhouib (2011) <sup>24</sup>      | Gel microcolumn assay (GMcA)                                 |
| Azarkeivan (2011) <sup>25</sup>         | Gel Card Method                                              |
| Thompson (2011) <sup>26</sup>           | Not specified                                                |
| Saied (2011) <sup>27</sup>              | Gel microcolumn assay (GMcA)                                 |
| Cheng (2012) <sup>28</sup>              | Gel microcolumn assay (GMcA)                                 |
| El-Danasoury (2012) <sup>29</sup>       | Gel microcolumn assay (GMcA)                                 |
| Chao (2013) <sup>30</sup>               | Not specified                                                |
| Makroo (2013) <sup>31</sup>             | Gel microplate assay (GMpA)                                  |
| Al-Riyami (2014) <sup>32</sup>          | Gel microcolumn assay (GMcA)                                 |
| Dhawan (2014) <sup>33</sup>             | Gel microcolumn assay (GMcA)                                 |
| Jain (2014) <sup>34</sup>               | Gel microcolumn assay (GMcA)                                 |
| Hussein (2014) <sup>35</sup>            | Gel microcolumn assay (GMcA)                                 |
| Philip (2014) <sup>36</sup>             | Gel microcolumn assay (GMcA)                                 |
| Koçyigit (2014) <sup>37</sup>           | Gel microcolumn assay (GMcA)                                 |
| Elhence (2014) <sup>38</sup>            | Gel microcolumn assay (GMcA)                                 |
| Vichinsky (2014) <sup>39</sup>          | Not specified                                                |
| Dogra (2015) <sup>40</sup>              | Gel microcolumn assay (GMcA)                                 |
| Datta (2015) <sup>41</sup>              | Gel microcolumn assay (GMcA)                                 |
| Jansuwan (2015) <sup>42</sup>           | Gel Card Method                                              |
| Seferi (2015) <sup>43</sup>             | Gel microcolumn assay (GMcA)                                 |
| Vaziri (2015) <sup>44</sup>             | Conventional tube test (CTT)                                 |
| Zaidi (2015) <sup>45</sup>              | Conventional tube test (CTT)                                 |
| Obaid (2015) <sup>46</sup>              | Gel microcolumn assay (GMcA)                                 |
| Davari (2016) <sup>47</sup>             | Conventional tube test (CTT)                                 |
| Abdelrazik (2016) <sup>48</sup>         | Gel microcolumn assay (GMcA)                                 |
| Bhuva (2017) <sup>49</sup>              | Gel microcolumn assay (GMcA)                                 |
| Davoudi-Kiakalayeh (2017) <sup>50</sup> | Conventional tube test (CTT)                                 |
| Alkindi (2017) <sup>51</sup>            | Gel microcolumn assay (GMcA)                                 |
| Al-Riyami (2018) <sup>52</sup>          | Gel microcolumn assay (GMcA)                                 |
| Moeen (2018) <sup>53</sup>              | Gel microcolumn assay (GMcA)                                 |

**Table SIV** - Detailed analysis of red blood cell alloantibodies in each study included in the systematic review (thalassaemia major vs thalassaemia intermedia).

| Study (year) <sup>ref</sup>             | Total thalassaemia patients | Alloimmunised thalassaemia patients |              | Total TM patients | Alloimmunised TM patients |             | Total TI patients | Alloimmunised TI patients |              |
|-----------------------------------------|-----------------------------|-------------------------------------|--------------|-------------------|---------------------------|-------------|-------------------|---------------------------|--------------|
|                                         |                             | N.                                  | %            |                   | N.                        | %           |                   | N.                        | %            |
| Singer (2000) <sup>13</sup>             | 64                          | 14                                  | 22           | 30                | NR                        | NR          | NR                | NR                        | NR           |
| Ameen (2003) <sup>14</sup>              | 190                         | 57                                  | 30           | 190               | 57                        | 30          | NC                | NC                        | NC           |
| Bilwani (2005) <sup>15</sup>            | 97                          | 9                                   | 9,2          | 97                | 9                         | 9,2         | NC                | NC                        | NC           |
| Wang (2006) <sup>16</sup>               | 30                          | 11                                  | 37           | 28                | NR                        | NR          | NR                | NR                        | NR           |
| Noor Haslina (2006) <sup>17</sup>       | 58                          | 5                                   | 8,6          | 8                 | 1                         | 12,5        | NR                | NR                        | NR           |
| Karimi (2007) <sup>18</sup>             | 711                         | 38                                  | 5,34         | NR                | NR                        | NR          | NR                | NR                        | NR           |
| Sadeghian (2009) <sup>19</sup>          | 313                         | 9                                   | 2,87         | NR                | NR                        | NR          | NR                | NR                        | NR           |
| Ahmed (2010) <sup>20</sup>              | 448                         | 37                                  | 8,26         | 389               | 33                        | 8,4         | 59                | 4                         | 6,8          |
| Pahuja (2010) <sup>21</sup>             | 211                         | 8                                   | 3,79         | NR                | NR                        | NR          | NR                | NR                        | NR           |
| Gupta (2011) <sup>22</sup>              | 116                         | 11                                  | 9,48         | 116               | 11                        | 9,48        | NC                | NC                        | NC           |
| Chaudhari (2011) <sup>23</sup>          | 32                          | 6                                   | 18,8         | 32                | 6                         | 18,8        | NC                | NC                        | NC           |
| Guirat-Dhouib (2011) <sup>24</sup>      | 130                         | 10                                  | 7,7          | 130               | 10                        | 7,7         | NC                | NC                        | NC           |
| Azarkeivan (2011) <sup>25</sup>         | 835                         | 101                                 | 12,1         | 707               | 77                        | 10,9        | 128               | 24                        | 18,8         |
| Thompson (2011) <sup>26</sup>           | 697                         | 115                                 | 16,5         | 528               | NR                        | NR          | 54                | NR                        | NR           |
| Saied (2011) <sup>27</sup>              | 95                          | 27                                  | 28,4         | 74                | 19                        | 25,7        | 21                | 8                         | 38,1         |
| Cheng (2012) <sup>28</sup>              | 382                         | 88                                  | 23           | 382               | 88                        | 23          | NC                | NC                        | NC           |
| El-Danasoury (2012) <sup>29</sup>       | 235                         | 46                                  | 19,5         | 235               | 46                        | 19,5        | NC                | NC                        | NC           |
| Chao (2013) <sup>30</sup>               | 64                          | 6                                   | 9,4          | 64                | 6                         | 9,4         | NC                | NC                        | NC           |
| Makroo (2013) <sup>31</sup>             | 462                         | 19                                  | 4,1          | NR                | NR                        | NR          | NR                | NR                        | NR           |
| Al-Riyami (2014) <sup>32</sup>          | 37                          | 7                                   | 18,9         | NC                | NC                        | NC          | 37                | 7                         | 18,9         |
| Dhawan (2014) <sup>33</sup>             | 319                         | 18                                  | 5,6          | 319               | 18                        | 5,6         | NC                | NC                        | NC           |
| Jain (2014) <sup>34</sup>               | 96                          | 5                                   | 5,21         | 96                | 5                         | 5,21        | NC                | NC                        | NC           |
| Hussein (2014) <sup>35</sup>            | 272                         | 62                                  | 22,8         | NR                | NR                        | NR          | NR                | NR                        | NR           |
| Philip (2014) <sup>36</sup>             | 200                         | 6                                   | 3            | NR                | NR                        | NR          | NR                | NR                        | NR           |
| Koçyigit (2014) <sup>37</sup>           | 139                         | 9                                   | 6,5          | 109               | 4                         | 3,7         | 30                | 5                         | 16,7         |
| Elhence (2014) <sup>38</sup>            | 280                         | 24                                  | 8,6          | NR                | NR                        | NR          | NR                | NR                        | NR           |
| Vichinsky (2014) <sup>39</sup>          | 407                         | 77                                  | 19           | 70                | NR                        | NR          | 9                 | NR                        | NR           |
| Dogra (2015) <sup>40</sup>              | 70                          | 6                                   | 8,6          | 59                | 6                         | 10,2        | 8                 | 0                         | 0            |
| Datta (2015) <sup>41</sup>              | 500                         | 28                                  | 5,6          | 333               | 19                        | 5,71        | 167               | 9                         | 5,39         |
| Jansuwan (2015) <sup>42</sup>           | 143                         | 25                                  | 17,5         | 143               | 25                        | 17,5        | NC                | NC                        | NC           |
| Seferi (2015) <sup>43</sup>             | 118                         | 14                                  | 11,8         | 118               | 14                        | 11,8        | NC                | NC                        | NC           |
| Vaziri (2015) <sup>44</sup>             | 100                         | 4                                   | 4            | NR                | NR                        | NR          | NR                | NR                        | NR           |
| Zaidi (2015) <sup>45</sup>              | 162                         | 14                                  | 8,6          | 162               | 14                        | 8,6         | NC                | NC                        | NC           |
| Obaid (2015) <sup>46</sup>              | 40                          | 18                                  | 45           | 26                | NR                        | NR          | 14                | NR                        | NR           |
| Davari (2016) <sup>47</sup>             | 49                          | 8                                   | 16,32        | 49                | 8                         | 16,32       | NR                | NR                        | NR           |
| Abdelrazik (2016) <sup>48</sup>         | 188                         | 15                                  | 7,98         | 147               | 7                         | 4,76        | 41                | 8                         | 19,5         |
| Bhuva (2017) <sup>49</sup>              | 300                         | 8                                   | 3            | 300               | 8                         | 2,67        | NC                | NC                        | NC           |
| Davoudi-Kiakalayah (2017) <sup>50</sup> | 190                         | 47                                  | 24,7         | NR                | NR                        | NR          | NR                | NR                        | NR           |
| Alkindi (2017) <sup>51</sup>            | 129                         | 26                                  | 20,2         | NR                | NR                        | NR          | NR                | NR                        | NR           |
| Al-Riyami (2018) <sup>52</sup>          | 268                         | 25                                  | 9,3          | 268               | 25                        | 9,3         | NC                | NC                        | NC           |
| Moecen (2018) <sup>53</sup>             | 302                         | 12                                  | 4            | 302               | 12                        | 4           | NC                | NC                        | NC           |
| <b>Total cases</b>                      | <b>9,479</b>                | <b>1,075</b>                        | <b>11,34</b> | <b>5,511</b>      | <b>528</b>                | <b>9,58</b> | <b>568</b>        | <b>65</b>                 | <b>11,44</b> |

NR: not reported; NC: no cases; TM: thalassaemia major; TI: thalassaemia intermedia.
